# Supplementary material for: Visible light triggered, catalyst free approach for the synthesis of thiazoles and imidazo[2,1-b]thiazoles in EtOH : H2O green medium
Source: Royal Society of Chemistry journal article supplement (doi:10.1039/c6ra05385h), 2016-01-01
Supplement: c6ra05385h1.pdf [file c6ra05385h1.pdf]

## Electronic Supplementary Information (ESI)

### Visible light triggered, catalyst free approach for the synthesis of thiazoles and imidazo[2,1-b]thiazoles in EtOH : H<sub>2</sub>O green medium

Anu Mishra,<sup>a</sup> Madhulika Srivastava,<sup>a</sup> Pratibha Rai,<sup>a</sup> Snehlata Yadav,<sup>a</sup> Bhartendu Pati Tripathi,<sup>a</sup> Jaya Singh<sup>b</sup> and Jagdamba Singh<sup>a\*</sup>

<sup>a</sup>Environmentally Benign Synthesis Lab, Department of Chemistry, University of Allahabad, Allahabad-211002 (India); Tel: +919415218507; E-mail: dr.jdsau@gmail.com

<sup>b</sup>Department of Chemistry, LRP College, Sahibabad, Uttar Pradesh, India. E-mail: nimesh.singh@in.abb.com

### Experimental

**General Information:** Reagents were obtained from commercial suppliers, and used without further purification unless otherwise specified by a reference. All reactions were performed using oven-dried glass wares. Organic solutions were concentrated using a Buchi rotary evaporator. TLC was performed using silica gel GF254 (Merck) plates. Melting points were determined by open glass capillary method and are uncorrected. IR spectra in KBr were recorded on a Perkin-Elmer 993 IR spectrophotometer, <sup>1</sup>H NMR spectra were recorded on a Bruker AVII 400 spectrometer in DMSO-d<sub>6</sub> and CDCl<sub>3</sub> using TMS as internal reference with chemical shift value being reported in ppm. All coupling constants (*J*) are reported in Hertz (Hz). Elemental analysis were carried out in a Coleman automatic carbon, hydrogen and nitrogen analyzer.

**General method:** A mixture of 1 mmol of phenacyl bromide (**1**) and N-phenylthiourea (**2**) was added in ethanol and water (**4: 1**, 10ml). The mixture was irradiated with 24 W CFL stirring at rt. for 5–10min. After the completion of the reaction (monitored by TLC), water (10 ml) was added and the mixture was filtered. Solid was washed with water and a yield of 81–96% was obtained. Same procedure was applied for the formation of **5a-5g**. The aqueous layer was extracted with ethyl acetate (3 ×10 ml). The combined organic layers were extracted with water, dried over anhydrous Na<sub>2</sub>SO<sub>4</sub>. The combined organic layers were evaporated under reduced pressure and the resulting crude product was purified by column chromatography by using ethyl acetate and hexane as eluent. The product was confirmed by IR, <sup>1</sup>H and mass spectra. All the compounds

that were obtained are known and were characterized by comparison of their spectral data with those reported in literature.

**Table 2 optimization table of reaction conditions<sup>a</sup>**

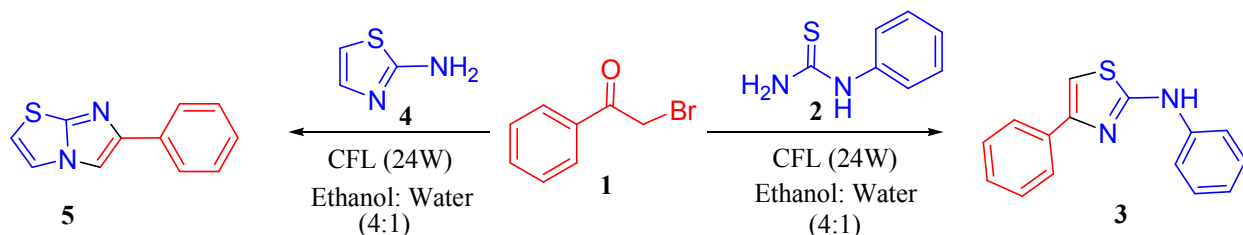

| Entry | Reaction Condition                  | Time(min) | Yield <sup>b</sup> (3a) | Time(h) | Yield <sup>b</sup> (5a) |
|-------|-------------------------------------|-----------|-------------------------|---------|-------------------------|
| 1     | 24W, CFL, air, no catalyst          | 10        | 95                      | 5       | 60                      |
| 2     | Daylight, air, no catalyst          | 10        | 43                      | 5       | 18                      |
| 3     | No light, air, no catalyst          | 10        | 34                      | 5       | 10                      |
| 4     | CFL, degassed                       | 10        | 54                      | 5       | - <sup>c</sup>          |
| 5     | CFL, N <sub>2</sub>                 | 10        | 36                      | 5       | - <sup>c</sup>          |
| 6     | 20W, CFL, air, no catalyst          | 10        | 87                      | 5       | 52                      |
| 7     | 18 W, CFL, air, no catalyst         | 10        | 80                      | 5       | 40                      |
| 8     | White LED (7W), no catalyst         | 10        | 76                      | 5       | 23                      |
| 9     | CFL, air, eosinY (0.5 mol %)        | 10        | 96                      | 5       | 60                      |
| 10    | CFL, air, eosin Y (1mol %)          | 10        | 96                      | 5       | 60                      |
| 11    | CFL, Air, Benzoquinone <sup>d</sup> | 10        | 52                      | 5       | 16                      |

<sup>a</sup>Reaction condition: **1a** (1.0 mmol), **2a** (1.0 mmol) in ethanol: water irradiated using CFL under open air at room temperature. <sup>b</sup>Yield of the product (%). <sup>c</sup>not detected. <sup>d</sup>2 mmol.

### Structure of the Products (3)

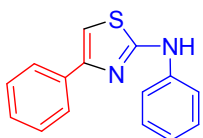

3aa  
Yield=95%  
Time=8min

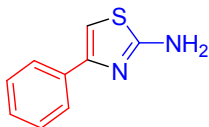

3ab  
Yield=88%  
Time=10min

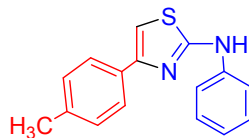

3ba  
Yield=85%  
Time=10min

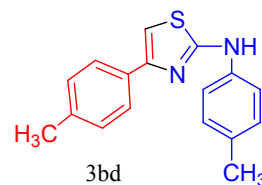

3bd  
Yield=82%  
Time=10min

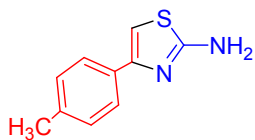

3bb  
Yield=82%  
Time=10min

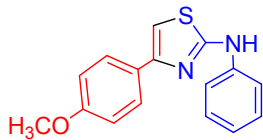

3ca  
Yield=87%  
Time=9min

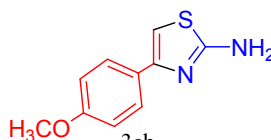

3cb  
Yield=85%  
Time=9min

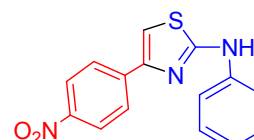

3da  
Yield=96%  
Time=5min

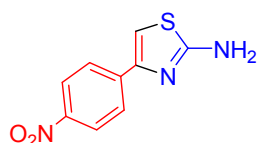

3db  
Yield=94%  
Time=5min

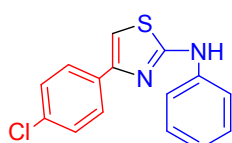

3ea  
Yield=94%  
Time=7min

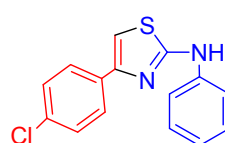

3ec  
Yield=94%  
Time=7min

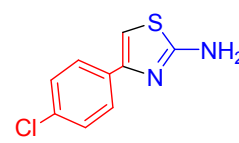

3eb  
Yield=90%  
Time=9min

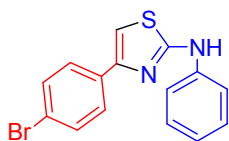

3fa  
Yield=89%  
Time=9min

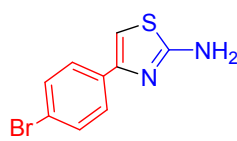

3fb  
Yield=87%  
Time=10min

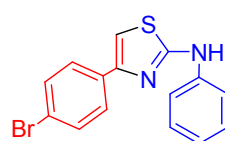

3fc  
Yield=89%  
Time=8min

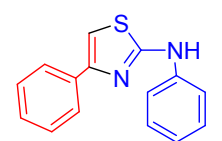

3ae  
Yield=81%  
Time=10min

### Structure of the Products (5)

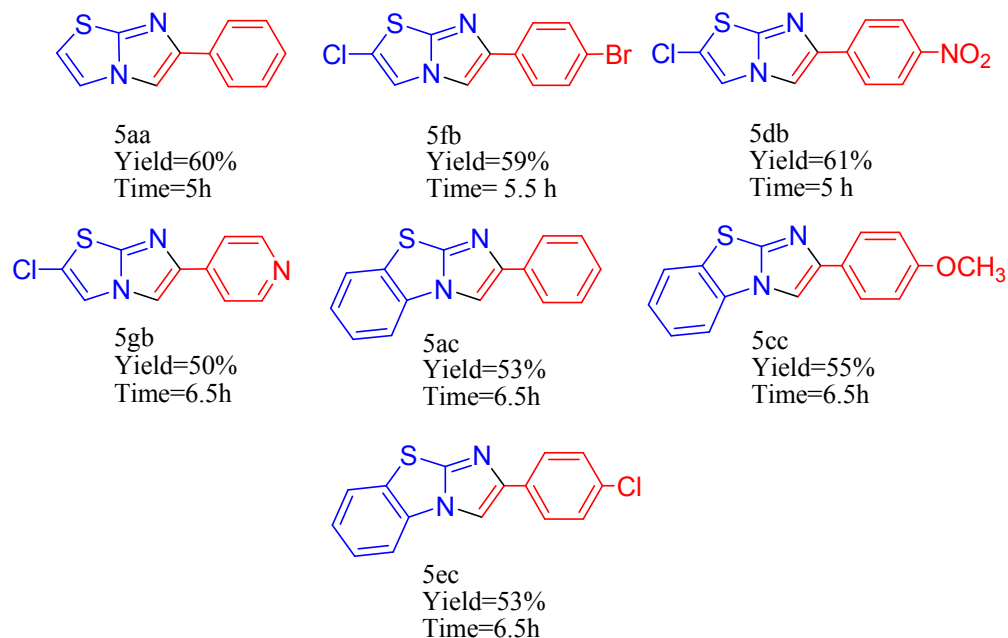

Spectral data and Melting Point of isolated and purified compounds are summarized below:

#### (3aa) *N*-4-Diphenylthiazol-2-amine: (m.p. 133-135 °C; lit. m.p. 134-136 °C)

White solid; IR (KBr)  $\nu_{\max}$  (cm<sup>-1</sup>): 3387, 3102, 3058, 2935, 1601, 1584, 1520, 1480, 1458; <sup>1</sup>H NMR (400 MHz, DMSO-*d*<sub>6</sub>):  $\delta$  7.13 (s, 1H), 6.97-7.02 (m, 1H), 7.26-7.30 (m, 5H), 7.31-7.40 (m, 2H), 7.86 (d, *J* = 7.6 Hz, 2H), 10.13 (s, 1H); MS (ESI) *m/z*: 253 [M+H]; Anal. Calcd. for C<sub>15</sub>H<sub>12</sub>N<sub>2</sub>S: C, 71.40; H, 4.79; N, 11.10; Found: C, 71.20; H, 4.82; N, 11.26.

#### (3ab) 4-Phenylthiazol-2-amine: (m.p. 149-151 °C; lit. m.p. 150-152 °C)

White solid; IR (KBr)  $\nu_{\max}$  (cm<sup>-1</sup>): 3441, 3256, 3145, 3120, 1588, 1536, 1516, 1485, 1444; <sup>1</sup>H NMR (400 MHz, DMSO-*d*<sub>6</sub>):  $\delta$  7.00 (s, 1H), 7.06 (s, 2H), 7.24 (t, *J* = 7.6 Hz, 1H), 7.35 (t, *J* = 7.6 Hz, 2H), 7.80 (d, *J* = 7.6 Hz, 2H); MS (ESI) *m/z*: 177 [M+H]; Anal. Calcd. for C<sub>9</sub>H<sub>8</sub>N<sub>2</sub>S: C, 61.34; H, 4.58; N, 15.90; Found: C, 61.24; H, 4.63; N, 15.61.

#### (3ba) *N*-Phenyl-4-*p*-tolylthiazol-2-amine: (m.p. 103-105 °C; lit. m.p. 102-103 °C)

White solid; IR (KBr)  $\nu_{\max}$  (cm<sup>-1</sup>): 3376, 3116, 3048, 2915, 2850, 1612, 1585, 1555, 1488, 1452, 1403; <sup>1</sup>H NMR (400 MHz, DMSO-*d*<sub>6</sub>):  $\delta$  2.34 (s, 3H), 6.95 (t, *J* = 7.6 Hz, 1H), 7.25 (d, *J* = 7.6

Hz, 2H), 7.24 (s, 1H), 7.36 (t,  $J = 7.6$  Hz, 2H), 7.73 (d,  $J = 8.0$  Hz, 2H), 7.83 (d,  $J = 8.0$  Hz, 2H), 10.22 (s, 1H); MS (ESI)  $m/z$ : 267 [M+H]; Anal. Calcd. for  $C_{16}H_{14}N_2S$ : C, 72.15; H, 5.30; N, 10.52; Found: C, 72.22; H, 5.14; N, 10.38.

**(3bb) 4-*p*-Tolylthiazol-2-amine: (m.p. 133-135 °C; lit. m.p. 135-136 °C)**

Pale yellow solid; IR (KBr)  $\nu_{\max}$  ( $cm^{-1}$ ): 3451, 3293, 3122, 2753, 1630, 1532, 1524, 1488;  $^1H$  NMR (400 MHz, DMSO- $d_6$ ):  $\delta$  2.30 (s, 3H), 6.92 (s, 1H), 7.02 (s, 2H), 7.17 (d,  $J = 8.0$  Hz, 2H), 7.66 (d,  $J = 8.0$  Hz, 2H); MS (ESI)  $m/z$ : 191 [M+H]; Anal. Calcd. for  $C_{10}H_{10}N_2S$ : C, 63.13; H, 5.30; N, 14.72; Found: C, 63.04; H, 5.38; N, 14.78.

**(3ca) 4-(4-Methoxyphenyl)-*N*-phenylthiazol-2-amine: (m.p. 136-137 °C; lit. m.p. 138-139 °C)**

White solid; IR (KBr)  $\nu_{\max}$  ( $cm^{-1}$ ): 3355, 3102, 2955, 2940, 2838, 1591, 1553, 1510, 1480, 1465, 1422, 1245;  $^1H$  NMR (400 MHz, DMSO- $d_6$ ):  $\delta$  3.80 (s, 3H), 6.95-7.01 (m, 3H), 7.15 (s, 1H), 7.33 (t,  $J = 7.6$  Hz, 2H), 7.71 (d,  $J = 8.0$  Hz, 2H), 7.84 (d,  $J = 8.0$  Hz, 2H), 10.24 (s, 1H); MS (ESI)  $m/z$ : 283 [M+H]; Anal. Calcd. for  $C_{16}H_{14}N_2OS$ : C, 68.06; H, 5.00; N, 9.92; Found: C, 67.70; H, 5.11; N, 10.01.

**(3cb) 4-(4-Methoxyphenyl) thiazol-2-amine: (m.p. 202-205 °C; lit. m.p. 204-206 °C)**

White solid; IR (KBr)  $\nu_{\max}$  ( $cm^{-1}$ ): 3442, 3261, 3122, 2955, 2830, 1628, 1613, 1532, 1529, 1488, 1242;  $^1H$  NMR (400 MHz, DMSO- $d_6$ ):  $\delta$  3.79 (s, 3H), 6.83 (s, 1H), 6.91 (d,  $J = 8.8$  Hz, 2H), 7.00 (s, 2H), 7.72 (d,  $J = 8.8$  Hz, 2H); MS (ESI)  $m/z$ : 207 [M+H]; Anal. Calcd. for  $C_{10}H_{10}N_2OS$ : C, 58.23; H, 4.89; N, 13.58; Found: C, 58.10; H, 4.70; N, 13.65.

**(3da) 4-(4-Nitrophenyl)-*N*-phenylthiazol-2-amine: (m.p. 204-206 °C; lit. m.p. 206-207 °C)**

Orange solid; IR (KBr)  $\nu_{\max}$  ( $cm^{-1}$ ): 3336, 3113, 3076, 2921, 1611, 1596, 1546, 1529, 1488, 1441, 1412, 1315;  $^1H$  NMR (400 MHz, DMSO- $d_6$ ):  $\delta$  7.01 (t,  $J = 7.2$  Hz, 1H), 7.38 (t,  $J = 7.2$  Hz, 2H), 7.74 (d,  $J = 7.2$  Hz, 2H), 7.76 (s, 1H), 8.17 (d,  $J = 8.8$  Hz, 2H), 8.31 (d,  $J = 8.8$  Hz, 2H), 10.42 (s, 1H); MS (ESI)  $m/z$ : 298 [M+H]; Anal. Calcd. for  $C_{15}H_{11}N_3O_2S$ : C, 60.59; H, 3.73; N, 14.13; Found: C, 60.40; H, 3.60; N, 14.02.

**(3db) 4-(4-Nitrophenyl)thiazol-2-amine: (m.p. 284-285 °C; lit. m.p. 284-286 °C)**

Orange solid; IR (KBr)  $\nu_{\max}$  (cm<sup>-1</sup>): 3392, 3310, 3146, 3122, 2928, 1646, 1596, 1532, 1512, 1508, 1415, 1326; <sup>1</sup>H NMR (400 MHz, DMSO-*d*<sub>6</sub>):  $\delta$  7.25 (s, 2H), 7.41 (s, 1H), 8.06 (d, *J* = 8.8 Hz, 2H), 8.23 (d, *J* = 8.8 Hz, 2H); MS (ESI) *m/z*: 222 [M+H]; Anal. Calcd. for C<sub>9</sub>H<sub>7</sub>N<sub>3</sub>O<sub>2</sub>S: C, 48.86; H, 3.19; N, 18.99; Found: C, 48.59; H, 3.26; N, 18.62.

**(3ea) 4-(4-Chlorophenyl)-*N*-phenylthiazol-2-amine: (m.p. 143-145 °C; lit. m.p. 144-146 °C)**

White solid; IR (KBr)  $\nu_{\max}$  (cm<sup>-1</sup>): 3386, 3108, 3062, 2931, 1587, 1568, 1488, 1475, 1449, 1408, 689; <sup>1</sup>H NMR (400 MHz, DMSO-*d*<sub>6</sub>):  $\delta$  7.01 (t, *J* = 7.6 Hz, 1H), 7.34 (t, *J* = 7.6 Hz, 2H), 7.42 (s, 1H), 7.50 (d, *J* = 7.6 Hz, 2H), 7.72 (d, *J* = 8.0 Hz, 2H), 7.95 (d, *J* = 8.0 Hz, 2H), 10.22 (s, 1H); MS (ESI) *m/z*: 287 [M+H]; Anal. Calcd. for C<sub>15</sub>H<sub>11</sub>ClN<sub>2</sub>S: C, 62.82; H, 3.87; N, 9.77; Found: C, 62.73; H, 3.71; N, 9.62.

**(3eb) 4-(4-Chlorophenyl) thiazol-2-amine: (m.p. 165-167 °C; lit. m.p. 167–168 °C)**

White solid; IR (KBr)  $\nu_{\max}$  (cm<sup>-1</sup>): 3443, 3276, 3118, 3025, 2752, 1629, 1578, 1538, 1473, 1409, 726; <sup>1</sup>H NMR (400 MHz, DMSO-*d*<sub>6</sub>):  $\delta$  7.14 (s 2H), 7.44 (d, *J* = 8.4 Hz, 2H), 7.56 (s, 1H), 7.80 (d, *J* = 8.4 Hz, 2H); MS (ESI) *m/z*: 211 [M+H]; Anal. Calcd. for C<sub>9</sub>H<sub>7</sub>ClN<sub>2</sub>S: C, 51.31; H, 3.35; N, 13.30; Found: C, 51.10; H, 3.42; N, 13.43.

**(3fa) 4-(4-Bromophenyl)-*N*-phenylthiazol-2-amine: (m.p. 231-233 °C; lit. m.p. 230-232 °C)**

White solid; IR (KBr)  $\nu_{\max}$  (cm<sup>-1</sup>): 3450, 2965, 1626, 1603, 1575, 1561, 1535, 1505, 590; <sup>1</sup>H NMR (400 MHz, DMSO-*d*<sub>6</sub>):  $\delta$  6.99 (t, *J* = 7.2 Hz, 1H), 7.36 (t, *J* = 7.2 Hz, 2H), 7.44 (s, 1H), 7.62 (d, *J* = 8.4 Hz, 2H), 7.73 (d, *J* = 7.2 Hz, 2H), 7.89 (d, *J* = 8.4 Hz, 2H), 10.24 (s, 1H); MS (ESI) *m/z*: 332 [M+H]; Anal. Calcd. for C<sub>15</sub>H<sub>11</sub>BrN<sub>2</sub>S: C, 54.39; H, 3.35; N, 8.46; Found: C, 54.17; H, 3.25; N, 8.30.

**(3fb) 4-(4-Bromophenyl)thiazol-2-amine: (m.p. 181-183 °C; lit. m.p. 182-184 °C)**

White solid; IR (KBr)  $\nu_{\max}$  (cm<sup>-1</sup>): 3436, 3277, 3118, 3048, 2752, 1629, 1575, 1538, 1465, 1401, 572; <sup>1</sup>H NMR (400 MHz, DMSO-*d*<sub>6</sub>):  $\delta$  7.06 (s, 2H), 7.14 (s, 1H), 7.56 (d, *J* = 8.4 Hz, 2H), 7.75

(d,  $J = 8.4$  Hz, 2H); MS (ESI)  $m/z$ : 256 [M+H]; Anal. Calcd. for  $C_9H_7BrN_2S$ : C, 42.37; H, 2.77; N, 10.98; Found: C, 42.15; H, 2.65; N, 10.76.

**(5aa) 6-phenylimidazo [2, 1-b]thiazole: (m.p. 134-137 °C)**

IR (KBr)  $\nu_{\max}$  ( $cm^{-1}$ ): 3031, 2810, 1615, 1560, 1526, 1459, 1408;  $^1H$  NMR (400 MHz, DMSO- $d_6$ ):  $\delta$  7.18-7.20 (1H, d,  $J=4.44$ ), 7.23 (1H, t); 7.35-7.39 (2H, t), 7.80-7.83 (2H, d), 7.87-7.88 (1H, d,  $J=4.48$ ), 8.15 (1H, s); MS (ESI)  $m/z$ : 201[M+H]; Anal. Calcd. for  $C_{11}H_8N_2S$ : C, 65.97; H, 4.03; N, 13.99; Found: C, 65.39; H, 3.82; N, 13.26.

**(5fb) 6-(4-bromophenyl)-2-chloroimidazo[2, 1-b]thiazole: (m.p. 231-233 °C; lit. m.p. 233-235 °C)**

IR (KBr)  $\nu_{\max}$  ( $cm^{-1}$ ): 1542, 1193, 979, 738;  $^1H$  NMR (400 MHz, DMSO- $d_6$ )  $\delta$  7.60 (2H, d,  $J=8.4$ ), 7.80 (2H, d,  $J=8.4$ ), 8.28 (1H, s), 8.31 (1H, s); MS (ESI)  $m/z$ : 312 [M+H]; Anal. Calcd. for  $C_{11}H_6BrClN_2S$ : C, 42.13; H, 1.93; N, 8.93; Found: C, 39.58; H, 1.72; N, 8.01.

**(5ac) 2-Phenyl-benzo[d]imidazo[2,1-b]thiazole: (m.p. 101-103 °C; lit. m.p. 102-104 °C)**

IR (KBr)  $\nu_{\max}$  ( $cm^{-1}$ ): 3420, 2342, 1574;  $^1H$  NMR (400 MHz,  $CDCl_3$ ):  $\delta$  6.47-7.00 (m, 6H), 7.59-7.60 (m, 1H), 7.66-7.69 (m, 1H), 7.89-7.90 (m, 1H), 7.96 (s, 1H); MS (ESI)  $m/z$ : 251 [M+H]; Anal. Calcd. for  $C_{15}H_{10}N_2S$ : C, 71.97; H, 4.03; N, 11.19; Found: C, 71.65; H, 3.91; N, 10.59.

**(5cc) 2-(4-Methoxyphenyl)-benzo[d]imidazo[2,1-b]thiazole: (m.p. 174-176 °C; lit. m.p. 175-177 °C)**

IR (KBr)  $\nu_{\max}$  ( $cm^{-1}$ ): 3424, 2938, 1602, 1495;  $^1H$  NMR (400 MHz,  $CDCl_3$ ):  $\delta$  3.84 (s, 3H), 6.95-6.99 (m, 2H), 7.27-7.35 (m, 2H), 7.45-7.48 (m, 1H), 7.52-7.53 (m, 1H), 7.68-7.75 (m, 2H), 7.86 (s, 1H); MS (ESI)  $m/z$ : 281 [M+H]; Anal. Calcd. for  $C_{16}H_{12}N_2OS$ : C, 68.55; H, 4.31; N, 9.99; Found: C, 68.34; H, 4.16; N, 9.72.
